# Supplementary material for: Structural and luminescence properties of novel Eu3+-doped Na3Ba2LaNb10O30 phosphors with high quantum efficiency and excellent color purity for w-LED applications
Source: Royal Society of Chemistry journal article supplement (doi:10.1039/d4ra05026f), 2024-01-01
Supplement: d4ra05026f1.pdf [file d4ra05026f1.pdf]

## Suplimentary Information

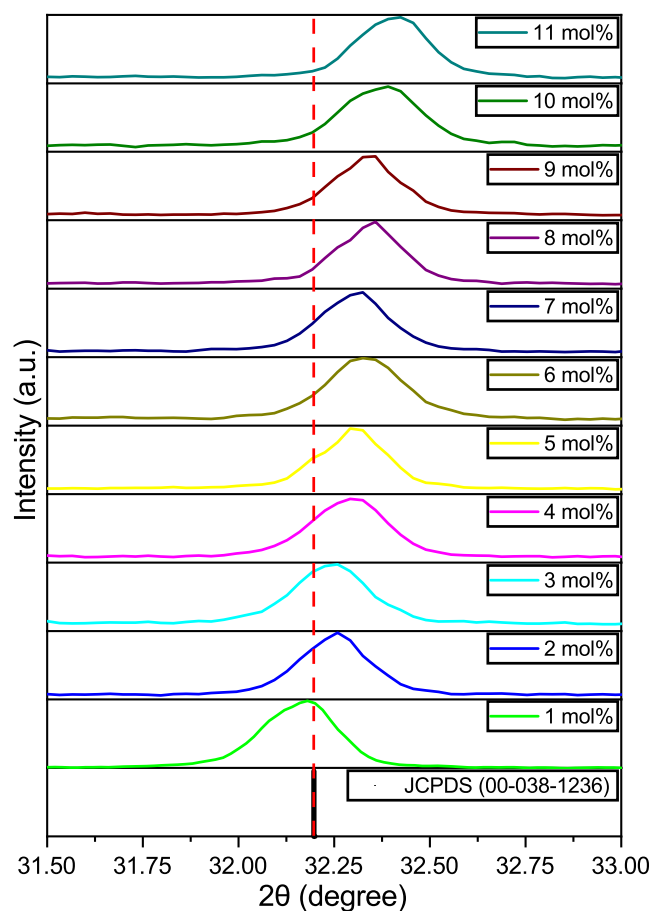

Fig. S1 XRD peak corresponding to 311 plane of  $\text{Na}_3\text{Ba}_2\text{LaNb}_{10}\text{O}_{30}:x\text{Eu}^{3+}$  ( $x = 1-11$  mol%) phosphors.

CIE 1931

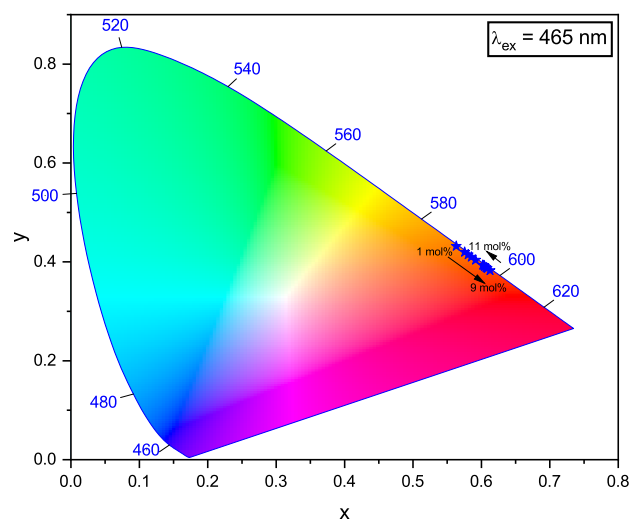

Fig. S2 CIE 1931 chromaticity diagram showing the color coordinates of  $\text{Na}_3\text{Ba}_2\text{LaNb}_{10}\text{O}_{30}:x\text{Eu}^{3+}$  ( $x = 1-11$  mol%) phosphors under the excitation wavelength of 465 nm.

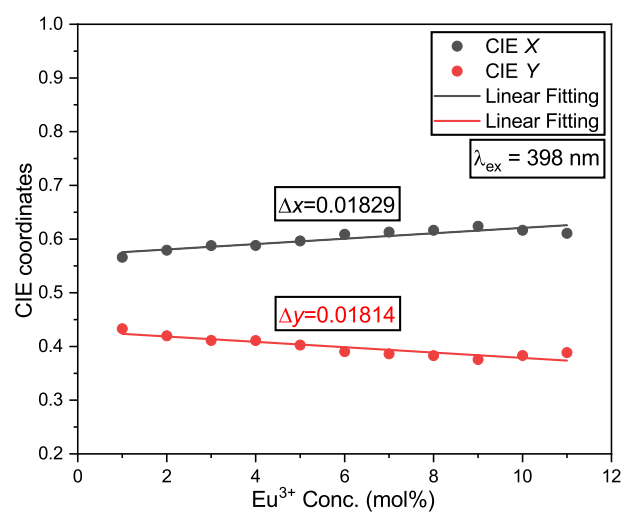

Fig. S3 The change between x and y CIE coordinates at excitation wavelength of 398 nm.

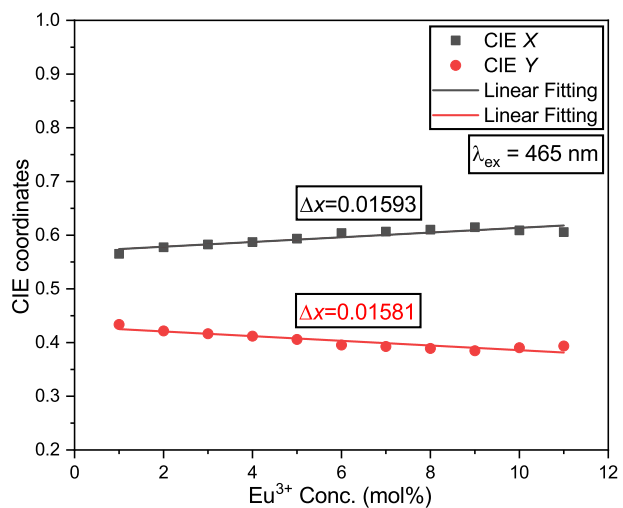

Fig. S4 The change between x and y CIE coordinates at excitation wavelength of 465 nm.

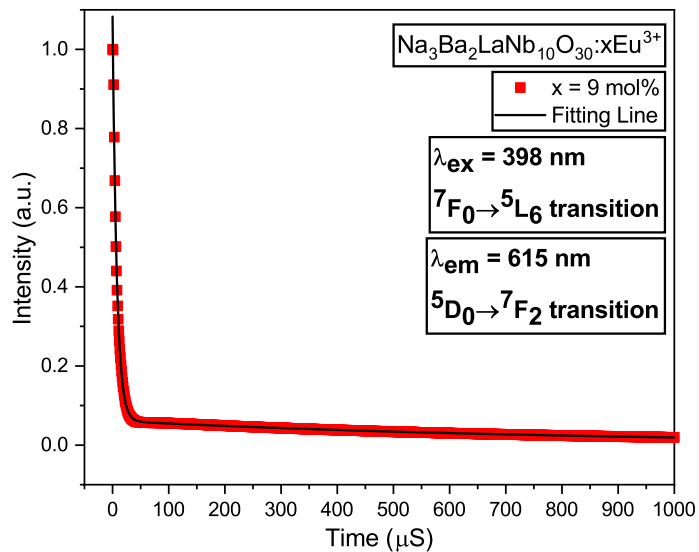

Fig. S5 Decay curve <sup>4</sup>F<sub>9/2</sub> → <sup>6</sup>H<sub>13/2</sub> transition in Na<sub>3</sub>Ba<sub>2</sub>LaNb<sub>10</sub>O<sub>30</sub>:xEu<sup>3+</sup> (x = 9 mol%) phosphor.

Table S1 Detailed data of Rietveld refinement profiles of  $\text{Na}_3\text{Ba}_2\text{LaNb}_{10}\text{O}_{30}:\text{xEu}^{3+}$  ( $\text{x} = 0\text{-}11$  mol%);  $\chi^2$  = reduced chi-square value;  $R_p$ ,  $R_{wp}$ ,  $R_{exp}$ ,  $\text{Bragg} - R$ ,  $R_f$  factors; a, b, c = lattice parameters, V = volume,  $\rho$  = density atom name; x, y, z = atomic fractional co-ordinates; occupancy.

| $\text{Eu}^{3+}$<br>(mol %) | $\chi^2$ | $R_p$<br>$R_{wp}$<br>$R_{exp}$<br>$\text{Bragg} - R$<br>$R_f$ | a (Å)<br>b (Å)<br>c (Å)<br>V (Å <sup>3</sup> )<br>$\rho$ (gm/cm <sup>3</sup> ) | atom | x       | y       | z       | occupancy |
|-----------------------------|----------|---------------------------------------------------------------|--------------------------------------------------------------------------------|------|---------|---------|---------|-----------|
| 0.0                         | 1.355    | 22.7<br>19.0<br>16.3<br>6.12<br>5.35                          | 12.4611<br>12.4611<br>3.9141<br>607.7784<br>5.168                              | Nb2  | 0.07486 | 0.21222 | 0.59085 | 1.00000   |
|                             |          |                                                               |                                                                                | Na1  | 0.00000 | 0.00000 | 0.13001 | 0.12500   |
|                             |          |                                                               |                                                                                | La1  | 0.00000 | 0.00000 | 0.13001 | 0.12500   |
|                             |          |                                                               |                                                                                | O5   | 0.00000 | 0.50000 | 0.13087 | 0.25000   |
|                             |          |                                                               |                                                                                | O1   | 0.14353 | 0.06861 | 0.51289 | 1.00000   |
|                             |          |                                                               |                                                                                | Ba2  | 0.17268 | 0.67268 | 0.10448 | 0.25000   |
|                             |          |                                                               |                                                                                | Na2  | 0.17268 | 0.67268 | 0.10448 | 0.25000   |
|                             |          |                                                               |                                                                                | O3   | 0.07782 | 0.19765 | 0.12277 | 1.00000   |
|                             |          |                                                               |                                                                                | Nb1  | 0.00000 | 0.50000 | 0.57417 | 0.25000   |
|                             |          |                                                               |                                                                                | O2   | 0.34882 | 0.00429 | 0.53723 | 1.00000   |
| 1.0                         | 1.449    | 44.4<br>32.5<br>27.0<br>17.2<br>12.1                          | 12.4571<br>12.4571<br>3.9176<br>607.9366<br>5.193                              | Nb2  | 0.07486 | 0.21222 | 0.59085 | 1.00000   |
|                             |          |                                                               |                                                                                | Na1  | 0.00000 | 0.00000 | 0.13001 | 0.17744   |
|                             |          |                                                               |                                                                                | La1  | 0.00000 | 0.00000 | 0.13001 | 0.12368   |
|                             |          |                                                               |                                                                                | Eu1  | 0.00000 | 0.00000 | 0.13001 | 0.00122   |
|                             |          |                                                               |                                                                                | O5   | 0.00000 | 0.50000 | 0.13087 | 0.25000   |
|                             |          |                                                               |                                                                                | O1   | 0.14353 | 0.06861 | 0.51289 | 1.00000   |
|                             |          |                                                               |                                                                                | Ba2  | 0.17268 | 0.67268 | 0.10448 | 0.25000   |
|                             |          |                                                               |                                                                                | Na2  | 0.17268 | 0.67268 | 0.10448 | 0.25000   |
|                             |          |                                                               |                                                                                | O3   | 0.07782 | 0.19765 | 0.12277 | 1.00000   |
|                             |          |                                                               |                                                                                | Nb1  | 0.00000 | 0.50000 | 0.57417 | 0.25000   |
| 2.0                         | 1.124    | 46.2<br>34.3<br>32.3<br>12.1<br>10.1                          | 12.4592<br>12.4592<br>3.9164<br>607.9491<br>5.187                              | O4   | 0.27765 | 0.77755 | 0.56658 | 0.50000   |
|                             |          |                                                               |                                                                                | Nb2  | 0.07486 | 0.21222 | 0.59085 | 1.00000   |
|                             |          |                                                               |                                                                                | Na1  | 0.00000 | 0.00000 | 0.13001 | 0.16500   |
|                             |          |                                                               |                                                                                | La1  | 0.00000 | 0.00000 | 0.13001 | 0.12247   |
|                             |          |                                                               |                                                                                | Eu1  | 0.00000 | 0.00000 | 0.13001 | 0.00249   |
|                             |          |                                                               |                                                                                | O5   | 0.00000 | 0.50000 | 0.13087 | 0.25000   |
|                             |          |                                                               |                                                                                | O1   | 0.14353 | 0.06861 | 0.51289 | 1.00000   |
|                             |          |                                                               |                                                                                | Ba2  | 0.17268 | 0.67268 | 0.10448 | 0.25000   |
|                             |          |                                                               |                                                                                | Na2  | 0.17268 | 0.67268 | 0.10448 | 0.25000   |
|                             |          |                                                               |                                                                                | O3   | 0.07782 | 0.19765 | 0.12277 | 1.00000   |
| 3.0                         | 1.516    | 92.8<br>48.4<br>39.3<br>27.0<br>18.7                          | 12.4589<br>12.4589<br>3.9182<br>608.1931<br>5.165                              | O4   | 0.27765 | 0.77755 | 0.56658 | 0.50000   |
|                             |          |                                                               |                                                                                | Nb2  | 0.07486 | 0.21222 | 0.59085 | 1.00000   |
|                             |          |                                                               |                                                                                | Na1  | 0.00000 | 0.00000 | 0.13001 | 0.12500   |
|                             |          |                                                               |                                                                                | La1  | 0.00000 | 0.00000 | 0.13001 | 0.12125   |
|                             |          |                                                               |                                                                                | Eu1  | 0.00000 | 0.00000 | 0.13001 | 0.00375   |
|                             |          |                                                               |                                                                                | O5   | 0.00000 | 0.50000 | 0.13087 | 0.25000   |
|                             |          |                                                               |                                                                                | O1   | 0.14353 | 0.06861 | 0.51289 | 1.00000   |
|                             |          |                                                               |                                                                                | Ba2  | 0.17268 | 0.67268 | 0.10448 | 0.25000   |
|                             |          |                                                               |                                                                                | Na2  | 0.17268 | 0.67268 | 0.10448 | 0.25000   |
|                             |          |                                                               |                                                                                | O3   | 0.07782 | 0.19765 | 0.12277 | 1.00000   |
| 4.0                         | 1.022    | 40.6<br>30.7<br>30.3<br>20.6<br>11.2                          | 12.4593<br>12.4593<br>3.9168<br>608.0267<br>5.173                              | O4   | 0.27765 | 0.77755 | 0.56658 | 0.50000   |
|                             |          |                                                               |                                                                                | Nb2  | 0.07486 | 0.21222 | 0.59085 | 1.00000   |
|                             |          |                                                               |                                                                                | Na1  | 0.00000 | 0.00000 | 0.13001 | 0.13611   |
|                             |          |                                                               |                                                                                | La1  | 0.00000 | 0.00000 | 0.13001 | 0.12033   |
|                             |          |                                                               |                                                                                | Eu1  | 0.00000 | 0.00000 | 0.13001 | 0.00500   |
|                             |          |                                                               |                                                                                | O5   | 0.00000 | 0.50000 | 0.13087 | 0.25000   |
|                             |          |                                                               |                                                                                | O1   | 0.14353 | 0.06861 | 0.51289 | 1.00000   |
|                             |          |                                                               |                                                                                | Ba2  | 0.17268 | 0.67268 | 0.10448 | 0.25000   |

Table S1 – continue on next page

Table S1 continued from previous page.

| Eu <sup>3+</sup><br>(mol %) | $\chi^2$ | $R_p$<br>$R_{wp}$<br>$R_{exp}$<br>$Bragg - R$<br>$R_f$ | a (Å)<br>b (Å)<br>c (Å)<br>V (Å <sup>3</sup> )<br>$\rho$ (gm/cm <sup>3</sup> ) | atom | x       | y                                    | z                                                 | occupancy |
|-----------------------------|----------|--------------------------------------------------------|--------------------------------------------------------------------------------|------|---------|--------------------------------------|---------------------------------------------------|-----------|
| 5.0                         | 1.091    | 38.1<br>29.4<br>28.2<br>15.0<br>11.1                   | 12.4582<br>12.4582<br>3.9175<br>608.0193<br>5.171                              | Na2  | 0.17268 | 0.67268                              | 0.10448                                           | 0.25000   |
|                             |          |                                                        |                                                                                | O3   | 0.07782 | 0.19765                              | 0.12277                                           | 1.00000   |
|                             |          |                                                        |                                                                                | Nb1  | 0.00000 | 0.50000                              | 0.57417                                           | 0.25000   |
|                             |          |                                                        |                                                                                | O2   | 0.34882 | 0.00429                              | 0.53723                                           | 1.00000   |
|                             |          |                                                        |                                                                                | O4   | 0.27765 | 0.77755                              | 0.56658                                           | 0.50000   |
|                             |          |                                                        |                                                                                | Nb2  | 0.07486 | 0.21222                              | 0.59085                                           | 1.00000   |
|                             |          |                                                        |                                                                                | Na1  | 0.00000 | 0.00000                              | 0.13001                                           | 0.13381   |
|                             |          |                                                        |                                                                                | La1  | 0.00000 | 0.00000                              | 0.13001                                           | 0.11897   |
|                             |          |                                                        |                                                                                | Eu1  | 0.00000 | 0.00000                              | 0.13001                                           | 0.00626   |
|                             |          |                                                        |                                                                                | O5   | 0.00000 | 0.50000                              | 0.13087                                           | 0.25000   |
|                             |          |                                                        |                                                                                | O1   | 0.14353 | 0.06861                              | 0.51289                                           | 1.00000   |
|                             |          |                                                        |                                                                                | Ba2  | 0.17268 | 0.67268                              | 0.10448                                           | 0.25000   |
|                             |          |                                                        |                                                                                | Na2  | 0.17268 | 0.67268                              | 0.10448                                           | 0.25000   |
|                             |          |                                                        |                                                                                | O3   | 0.07782 | 0.19765                              | 0.12277                                           | 1.00000   |
|                             |          |                                                        |                                                                                | Nb1  | 0.00000 | 0.50000                              | 0.57417                                           | 0.25000   |
| 6.0                         | 1.094    | 37.9<br>28.9<br>27.6<br>9.69<br>8.34                   | 12.4575<br>12.4575<br>3.9181<br>608.0471<br>5.177                              | O2   | 0.34882 | 0.00429                              | 0.53723                                           | 1.00000   |
|                             |          |                                                        |                                                                                | O4   | 0.27765 | 0.77755                              | 0.56658                                           | 0.50000   |
|                             |          |                                                        |                                                                                | Nb2  | 0.07486 | 0.21222                              | 0.59085                                           | 1.00000   |
|                             |          |                                                        |                                                                                | Na1  | 0.00000 | 0.00000                              | 0.13001                                           | 0.14575   |
|                             |          |                                                        |                                                                                | La1  | 0.00000 | 0.00000                              | 0.13001                                           | 0.11761   |
|                             |          |                                                        |                                                                                | Eu1  | 0.00000 | 0.00000                              | 0.13001                                           | 0.00750   |
|                             |          |                                                        |                                                                                | O5   | 0.00000 | 0.50000                              | 0.13087                                           | 0.25000   |
|                             |          |                                                        |                                                                                | O1   | 0.14353 | 0.06861                              | 0.51289                                           | 1.00000   |
|                             |          |                                                        |                                                                                | Ba2  | 0.17268 | 0.67268                              | 0.10448                                           | 0.25000   |
|                             |          |                                                        |                                                                                | Na2  | 0.17268 | 0.67268                              | 0.10448                                           | 0.25000   |
|                             |          |                                                        |                                                                                | O3   | 0.07782 | 0.19765                              | 0.12277                                           | 1.00000   |
|                             |          |                                                        |                                                                                | Nb1  | 0.00000 | 0.50000                              | 0.57417                                           | 0.25000   |
|                             |          |                                                        |                                                                                | O2   | 0.34882 | 0.00429                              | 0.53723                                           | 1.00000   |
|                             |          |                                                        |                                                                                | O4   | 0.27765 | 0.77755                              | 0.56658                                           | 0.50000   |
|                             |          |                                                        |                                                                                | 7.0  | 1.227   | 44.1<br>32.3<br>29.1<br>22.6<br>12.0 | 12.4578<br>12.4578<br>3.9176<br>607.9975<br>5.182 | O2        |
| O4                          | 0.27765  | 0.77755                                                | 0.56658                                                                        |      |         |                                      |                                                   | 0.50000   |
| Nb2                         | 0.07486  | 0.21222                                                | 0.59085                                                                        |      |         |                                      |                                                   | 1.00000   |
| Na1                         | 0.00000  | 0.00000                                                | 0.13001                                                                        |      |         |                                      |                                                   | 0.15510   |
| La1                         | 0.00000  | 0.00000                                                | 0.13001                                                                        |      |         |                                      |                                                   | 0.11631   |
| Eu1                         | 0.00000  | 0.00000                                                | 0.13001                                                                        |      |         |                                      |                                                   | 0.00875   |
| O5                          | 0.00000  | 0.50000                                                | 0.13087                                                                        |      |         |                                      |                                                   | 0.25000   |
| O1                          | 0.14353  | 0.06861                                                | 0.51289                                                                        |      |         |                                      |                                                   | 1.00000   |
| Ba2                         | 0.17268  | 0.67268                                                | 0.10448                                                                        |      |         |                                      |                                                   | 0.25000   |
| Na2                         | 0.17268  | 0.67268                                                | 0.10448                                                                        |      |         |                                      |                                                   | 0.25000   |
| O3                          | 0.07782  | 0.19765                                                | 0.12277                                                                        |      |         |                                      |                                                   | 1.00000   |
| Nb1                         | 0.00000  | 0.50000                                                | 0.57417                                                                        |      |         |                                      |                                                   | 0.25000   |
| O2                          | 0.34882  | 0.00429                                                | 0.53723                                                                        |      |         |                                      |                                                   | 1.00000   |
| O4                          | 0.27765  | 0.77755                                                | 0.56658                                                                        |      |         |                                      |                                                   | 0.50000   |
| 8.0                         | 1.273    | 43.4<br>32.4<br>28.7<br>24.4<br>13.0                   | 12.4596<br>12.4596<br>3.9156<br>607.8729<br>5.185                              |      |         |                                      |                                                   | O2        |
|                             |          |                                                        |                                                                                | O4   | 0.27765 | 0.77755                              | 0.56658                                           | 0.50000   |
|                             |          |                                                        |                                                                                | Nb2  | 0.07486 | 0.21222                              | 0.59085                                           | 1.00000   |
|                             |          |                                                        |                                                                                | Na1  | 0.00000 | 0.00000                              | 0.13001                                           | 0.15946   |
|                             |          |                                                        |                                                                                | La1  | 0.00000 | 0.00000                              | 0.13001                                           | 0.11523   |
|                             |          |                                                        |                                                                                | Eu1  | 0.00000 | 0.00000                              | 0.13001                                           | 0.00999   |
|                             |          |                                                        |                                                                                | O5   | 0.00000 | 0.50000                              | 0.13087                                           | 0.25000   |
|                             |          |                                                        |                                                                                | O1   | 0.14353 | 0.06861                              | 0.51289                                           | 1.00000   |
|                             |          |                                                        |                                                                                | Ba2  | 0.17268 | 0.67268                              | 0.10448                                           | 0.25000   |
|                             |          |                                                        |                                                                                | Na2  | 0.17268 | 0.67268                              | 0.10448                                           | 0.25000   |
|                             |          |                                                        |                                                                                | O3   | 0.07782 | 0.19765                              | 0.12277                                           | 1.00000   |
|                             |          |                                                        |                                                                                | Nb1  | 0.00000 | 0.50000                              | 0.57417                                           | 0.25000   |
|                             |          |                                                        |                                                                                | O2   | 0.34882 | 0.00429                              | 0.53723                                           | 1.00000   |
|                             |          |                                                        |                                                                                | O4   | 0.27765 | 0.77755                              | 0.56658                                           | 0.50000   |
|                             |          |                                                        |                                                                                | 9.0  | 1.121   | 40.6<br>29.6                         | 12.4596<br>12.4596                                | Nb2       |
| Na1                         | 0.00000  | 0.00000                                                | 0.13001                                                                        |      |         |                                      |                                                   | 0.15050   |

Table S1 – continue on next page

Table S1 continued from previous page.

| Eu <sup>3+</sup><br>(mol %) | $\chi^2$ | $R_p$<br>$R_{wp}$<br>$R_{exp}$<br>$Bragg - R$<br>$R_f$ | a (Å)<br>b (Å)<br>c (Å)<br>V (Å <sup>3</sup> )<br>$\rho$ (gm/cm <sup>3</sup> ) | atom    | x       | y       | z       | occupancy |
|-----------------------------|----------|--------------------------------------------------------|--------------------------------------------------------------------------------|---------|---------|---------|---------|-----------|
| 10.0                        | 1.117    | 27.9                                                   | 3.9152                                                                         | La1     | 0.00000 | 0.00000 | 0.13001 | 0.11399   |
|                             |          | 14.1                                                   | 607.7981                                                                       | Eu1     | 0.00000 | 0.00000 | 0.13001 | 0.01125   |
|                             |          | 11.2                                                   | 5.182                                                                          | O5      | 0.00000 | 0.50000 | 0.13087 | 0.25000   |
|                             |          |                                                        |                                                                                | O1      | 0.14353 | 0.06861 | 0.51289 | 1.00000   |
|                             |          |                                                        |                                                                                | Ba2     | 0.17268 | 0.67268 | 0.10448 | 0.25000   |
|                             |          |                                                        |                                                                                | Na2     | 0.17268 | 0.67268 | 0.10448 | 0.25000   |
|                             |          |                                                        |                                                                                | O3      | 0.07782 | 0.19765 | 0.12277 | 1.00000   |
|                             |          |                                                        |                                                                                | Nb1     | 0.00000 | 0.50000 | 0.57417 | 0.25000   |
|                             |          |                                                        |                                                                                | O2      | 0.34882 | 0.00429 | 0.53723 | 1.00000   |
|                             |          |                                                        |                                                                                | O4      | 0.27765 | 0.77755 | 0.56658 | 0.50000   |
|                             |          |                                                        |                                                                                | Nb2     | 0.07486 | 0.21222 | 0.59085 | 1.00000   |
|                             |          |                                                        |                                                                                | Na1     | 0.00000 | 0.00000 | 0.13001 | 0.17588   |
|                             |          |                                                        |                                                                                | La1     | 0.00000 | 0.00000 | 0.13001 | 0.11262   |
|                             |          |                                                        |                                                                                | Eu1     | 0.00000 | 0.00000 | 0.13001 | 0.01250   |
| 11.0                        | 1.476    | 58.2                                                   | 12.4654                                                                        | O5      | 0.00000 | 0.50000 | 0.13087 | 0.25000   |
|                             |          | 36.6                                                   | 12.4654                                                                        | O1      | 0.14353 | 0.06861 | 0.51289 | 1.00000   |
|                             |          | 30.2                                                   | 3.9170                                                                         | Ba2     | 0.17268 | 0.67268 | 0.10448 | 0.25000   |
|                             |          | 23.4                                                   | 608.6396                                                                       | Na2     | 0.17268 | 0.67268 | 0.10448 | 0.25000   |
|                             |          | 16.9                                                   | 5.179                                                                          | O3      | 0.07782 | 0.19765 | 0.12277 | 1.00000   |
|                             |          |                                                        |                                                                                | Nb1     | 0.00000 | 0.50000 | 0.57417 | 0.25000   |
|                             |          |                                                        |                                                                                | O2      | 0.34882 | 0.00429 | 0.53723 | 1.00000   |
|                             |          |                                                        |                                                                                | O4      | 0.27765 | 0.77755 | 0.56658 | 0.50000   |
|                             |          |                                                        |                                                                                | Nb2     | 0.07486 | 0.21222 | 0.59085 | 1.00000   |
|                             |          |                                                        |                                                                                | Na1     | 0.00000 | 0.00000 | 0.13001 | 0.14943   |
|                             |          |                                                        |                                                                                | La1     | 0.00000 | 0.00000 | 0.13001 | 0.11243   |
|                             |          |                                                        |                                                                                | Eu1     | 0.00000 | 0.00000 | 0.13001 | 0.01349   |
|                             |          |                                                        |                                                                                | O5      | 0.00000 | 0.50000 | 0.13087 | 0.25000   |
|                             |          |                                                        |                                                                                | O1      | 0.14353 | 0.06861 | 0.51289 | 1.00000   |
|                             |          | Ba2                                                    | 0.17268                                                                        | 0.67268 | 0.10448 | 0.25000 |         |           |
|                             |          | Na2                                                    | 0.17268                                                                        | 0.67268 | 0.10448 | 0.25000 |         |           |
|                             |          | O3                                                     | 0.07782                                                                        | 0.19765 | 0.12277 | 1.00000 |         |           |
|                             |          | Nb1                                                    | 0.00000                                                                        | 0.50000 | 0.57417 | 0.25000 |         |           |
|                             |          | O2                                                     | 0.34882                                                                        | 0.00429 | 0.53723 | 1.00000 |         |           |
|                             |          | O4                                                     | 0.27765                                                                        | 0.77755 | 0.56658 | 0.50000 |         |           |
